# Supplementary material
Source: Springer Nature journal article supplement (https://www.springermedizin.de/resource/supplementary/13633_2014_352_MOESM11_ESM.pdf/9596138)

# ISS. Adult Height Gain of Controls (Mean SDS & 95% CI) of Published Studies versus Adult Height Gain of Treated Children in Our Study

Published Studies (number of subjects) [ref #]

Lopez-Siguero et al 2000 (42) [4]

Coutant et al 2001 (51) [5]

Lopez-Siguero et al 1996 (44) [6]

Leschek et al 2004 (11) [1]

Hindmarsh et al 1996 (10) [7]

Buchlis et al 1998 (58) [8]

Albertsson-Wikland et al 2008 (19) [8]

McCaughey et al 1998 (6) [2]

Wit et al 2002 (64) [9]

Average of above studies

**OUR study (88)**

[SDS of Height]

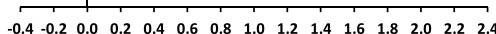

Supplement: MOESM11 [file 9596138]
